# Supplementary material for: Cancer immunotherapy with PI3K and PD-1 dual-blockade via optimal modulation of T cell activation signal
Source: J Immunother Cancer. 2021 Aug 20;9(8):e002279. doi: 10.1136/jitc-2020-002279 (PMC8395371; doi:10.1136/jitc-2020-002279)
Supplement: Supplementary data [file jitc-2020-002279supp001.xls]

## Sheet: Supplemental Table S1
Supplemental Table S1. Antibodies used in this study.
Antibody	Clone	Conjugate	Application	Vender
anti-mouse CD3	17A2	AF700	FCM	Biolegend
anti-mouse CD4	RM4-5	BV785	FCM	Biolegend
anti-mouse CD8	53-6.7	BV605	FCM	Biolegend
anti-mouse CD62L	MEL-14	FITC	FCM	Biolegend
anti-mouse/human KLRG1	2F1/KLRG1	BV421	FCM	Biolegend
anti-mouse CD127	A7R34	PerCP-Cy5.5	FCM	Biolegend
anti-mouse CD4	RM4-5	BV711	FCM	Biolegend
anti-mouse CD8	53-6.7	BV510	FCM	Biolegend
anti-mouse CD25	7D4	BV421	FCM	BD
anti-mouse FOXP3	R16-715	PerCP-Cy5.5	FCM	BD
anti-mouse TCF7	S33-966	PE	FCM	BD
anti-human CD3	UCHT1	AF700	FCM	BD
anti-human CD4	RPA-T4	BV786	FCM	BD
anti-human CD8	RPA-T8	BV605	FCM	Biolegend
anti-human CD127	A019D5	PE-Cy7	FCM	Biolegend
anti-human CD4	RPA-T4	PE-Cy7	FCM	BD
anti-human CD45RA	5H9	FITC	FCM	BD
anti-human CD25	BC96	BV785	FCM	Biolegend
anti-human FOXP3	236A/E7	AF647	FCM	BD
anti-human pAkt	M89-61	PE	FCM	BD
anti-human pAkt	D9E	-	WB	CST
anti-human pSLP-76	J141-668.36.58	PE	FCM	BD
anti-human pS6	D57.2.2E	-	WB	CST
anti-human CD4	RPA-T4	V500	FCM	BD
anti-human CD8	RPA-T8	PE-Cy7	FCM	Biolegend
anti-humanCCR7	2-L1-A	APC	FCM	BD
anti-CD45RA	HI100	BV711	FCM	Biolegend
anti-human CD25	M-A251	PE	FCM	BD
anti-human active form capase-3	C92-605	PE	FCM	BD
anti-human Ki67	11F6	FITC	FCM	Biolegend
anti-human β-actin	13E5	-	WB	CST
anti-mouse PD-1	RMP1-14	-	Neutralization	Biolegend
anti-human CD3	UCHT1	-	Stimulation	BD
anti-mouse Ig	polyclonal	-	Stimulation	BD
anti-mouse CD16/32	2.4G2	-	Fc block	BD
anti-human CD3	OKT3	-	Stimulation	Thermo Fisher Scientific
anti-human CD28	CD28.2	-	Stimulation	Thermo Fisher Scientific
anti-human Fc gamma receptor	polyclonal	-	Fc block	Thermo Fisher Scientific
fixable dye	-	eFlour 780	FCM	Thermo Fisher Scientific
anti-mouse CD25	PC-61.5.3	-	Neutralization	Bio X Cell

## Sheet: Supplemental Table S2
Supplemental Table S2. Antigen peptides and tetramers used in this study.
Origin of antigen peptide	Sequence of antigen peptide	Vender of antigen peptide	Tetramer	Conjugate	Vender of tetramer
CMV	NLVPMVATV	Eurofins Genomics	CMV/HLA-A*0201	PE	TCMetrix
Flu	GILGFVFTL	Eurofins Genomics	Flu/HLA-A*0201	PE	TCMetrix
Melan-A	ELAGIGILTV	Eurofins Genomics	Melan-A/HLA-A*0201	PE	TCMetrix
WT-1	CMTWNQMNL	Eurofins Genomics	WT-1/HLA-A*0201	PE-eFluor 610	TCMetrix
NY-ESO-1	SLLMWITQC	Eurofins Genomics	NY-ESO-1/HLA-A*0201	PE	TCMetrix
MAGE-A3	FLWGPRALV	Eurofins Genomics	MAGE-A3/HLA-A*0201	PE	TCMetrix
MAGE-A4	NYKRCFPVI	Eurofins Genomics	MAGE-A4/HLA-A*2402	APC	TCMetrix
			NY-ESO-1/Dd	APC	TCMetrix
			CMS5a-intAg/Kd	PE	TCMetrix

## Sheet: Supplemental Table S3
Supplemental Table S3. Inhibition by ZSTK474 against 261 protein kinases.
Workorder:	ZEY008
Customer:	Zenyaku Kogyo Co Ltd
Data:	Summary Sheet, Activity %
	ZSTK474 / SW-18-057 @ 1 µM
Abl(h)	104
ACK1(h)	104
ALK(h)	99
ALK4(h)	110
Arg(h)	95
ARK5(h)	110
ASK1(h)	104
Aurora-A(h)	93
Axl(h)	101
Bmx(h)	92
BRK(h)	99
BrSK1(h)	103
BrSK2(h)	103
BTK(h)	102
CaMKI(h)	101
CaMKIIβ(h)	97
CaMKIIγ(h)	115
CaMKIδ(h)	110
CaMKIIδ(h)	100
CaMKIV(h)	111
CDK1/cyclinB(h)	106
CDK2/cyclinA(h)	96
CDK2/cyclinE(h)	93
CDK3/cyclinE(h)	98
CDK5/p25(h)	96
CDK5/p35(h)	101
CDK6/cyclinD3(h)	107
CDK7/cyclinH/MAT1(h)	89
CDK9/cyclin T1(h)	116
CHK1(h)	105
CHK2(h)	93
CK1γ1(h)	102
CK1γ2(h)	112
CK1γ3(h)	111
CK1δ(h)	101
CK2(h)	84
CK2α2(h)	83
CLK2(h)	83
CLK3(h)	109
cKit(h)	79
CSK(h)	124
c-RAF(h)	75
cSRC(h)	105
DAPK1(h)	98
DAPK2(h)	103
DCAMKL2(h)	113
DDR2(h)	107
DMPK(h)	105
DRAK1(h)	108
DYRK2(h)	107
eEF-2K(h)	110
EGFR(h)	118
EphA1(h)	109
EphA2(h)	106
EphA3(h)	107
EphA4(h)	103
EphA5(h)	100
EphA7(h)	99
EphA8(h)	108
EphB2(h)	89
EphB1(h)	96
EphB3(h)	98
EphB4(h)	94
ErbB4(h)	100
FAK(h)	102
Fer(h)	92
Fes(h)	127
FGFR1(h)	93
FGFR2(h)	103
FGFR3(h)	101
FGFR4(h)	96
Fgr(h)	96
Flt1(h)	95
Flt3(h)	69
Flt4(h)	94
Fms(h)	103
Fyn(h)	97
GCK(h)	99
GRK5(h)	103
GRK6(h)	94
GRK7(h)	105
GSK3α(h)	131
GSK3β(h)	103
Haspin(h)	76
Hck(h)	104
HIPK1(h)	98
HIPK2(h)	129
HIPK3(h)	106
IGF-1R(h)	107
IKKα(h)	135
IKKβ(h)	126
IR(h)	107
IRR(h)	92
IRAK1(h)	100
IRAK4(h)	101
Itk(h)	111
JAK2(h)	105
JAK3(h)	119
JNK1α1(h)	99
JNK2α2(h)	93
JNK3(h)	99
KDR(h)	99
Lck(h)	104
LIMK1(h)	142
LKB1(h)	106
LOK(h)	105
Lyn(h)	121
MAPK1(h)	103
MAPK2(h)	116
MAPKAP-K2(h)	107
MAPKAP-K3(h)	109
MEK1(h)	117
MARK1(h)	128
MELK(h)	113
Mer(h)	68
Met(h)	42
MINK(h)	103
MKK6(h)	125
MKK7β(h)	69
MLCK(h)	98
MLK1(h)	112
Mnk2(h)	101
MRCKα(h)	98
MRCKβ(h)	111
MSK1(h)	100
MSK2(h)	99
MSSK1(h)	94
MST1(h)	117
MST2(h)	106
MST3(h)	102
mTOR(h)	4
MuSK(h)	98
NEK2(h)	104
NEK3(h)	100
NEK6(h)	107
NEK7(h)	97
NEK11(h)	88
NLK(h)	105
p70S6K(h)	124
PAK2(h)	104
PAK3(h)	100
PAK4(h)	100
PAK5(h)	109
PAK6(h)	111
PAR-1Bα(h)	94
PASK(h)	112
PDGFRα(h)	113
PDGFRβ(h)	98
PDK1(h)	105
PhKγ2(h)	144
Pim-1(h)	107
Pim-2(h)	101
Pim-3(h)	83
PKA(h)	112
PKBα(h)	93
PKBβ(h)	116
PKBγ(h)	88
PKCα(h)	109
PKCβI(h)	98
PKCβII(h)	88
PKCγ(h)	105
PKCδ(h)	107
PKCε(h)	108
PKCη(h)	99
PKCι(h)	108
PKCμ(h)	122
PKCθ(h)	94
PKCζ(h)	96
PKD2(h)	93
PKG1α(h)	112
PKG1β(h)	105
Plk1(h)	58
Plk3(h)	109
PRAK(h)	99
PRK2(h)	112
PrKX(h)	108
PTK5(h)	108
Pyk2(h)	115
Ret(h)	124
RIPK2(h)	105
ROCK-I(h)	104
ROCK-II(h)	100
Ron(h)	123
Ros(h)	127
Rse(h)	127
Rsk1(h)	79
Rsk2(h)	75
Rsk3(h)	80
Rsk4(h)	91
SAPK2a(h)	100
SAPK2b(h)	97
SAPK3(h)	100
SAPK4(h)	105
SGK(h)	135
SGK2(h)	105
SGK3(h)	97
SIK(h)	111
Snk(h)	111
Src(1-530)(h)	112
SRPK1(h)	106
SRPK2(h)	127
STK33(h)	102
Syk(h)	130
TAK1(h)	105
TAO1(h)	100
TAO2(h)	88
TAO3(h)	104
TBK1(h)	107
Tie2(h)	115
TLK2(h)	114
TrkA(h)	78
TrkB(h)	69
TSSK1(h)	107
TSSK2(h)	109
Txk(h)	115
ULK2(h)	102
ULK3(h)	104
WNK2(h)	100
WNK3(h)	106
VRK2(h)	107
Yes(h)	101
ZAP-70(h)	126
ZIPK(h)	97
Abl(m)	103
Abl (H396P) (h)	89
Abl (M351T)(h)	107
Abl (Q252H) (h)	100
Abl(T315I)(h)	53
Abl(Y253F)(h)	91
AMPK(r)	118
Arg(m)	96
Blk(m)	82
BTK(R28H)(h)	107
CHK2(I157T)(h)	99
CHK2(R145W)(h)	95
CK1(y)	76
cKit(D816V)(h)	129
cKit(D816H)(h)	101
cKit(V560G)(h)	109
cKit(V654A)(h)	103
EGFR(L858R)(h)	98
EGFR(L861Q)(h)	100
EGFR(T790M)(h)	112
EGFR(T790M,L858R)(h)	113
FGFR1(V561M)(h)	83
FGFR2(N549H)(h)	102
Flt3(D835Y)(h)	59
Lyn(m)	111
MAPK2(m)	114
MKK4(m)	84
mTOR/FKBP12(h)	4
PDGFRα(D842V)(h)	115
PDGFRα(V561D)(h)	116
Ret (V804L)(h)	102
Ret(V804M)(h)	60
ROCK-II(r)	104
Rsk1(r)	70
SAPK2a(T106M)(h)	99
Src(T341M)(h)	113
Tie2(R849W)(h)	100
Tie2(Y897S)(h)	100
