# Supplementary figures and images for: Cancer immunotherapy with PI3K and PD-1 dual-blockade via optimal modulation of T cell activation signal
Source: HighWire-hosted journal article supplement (doi:10.1136/jitc-2020-002279), 2021-08-01

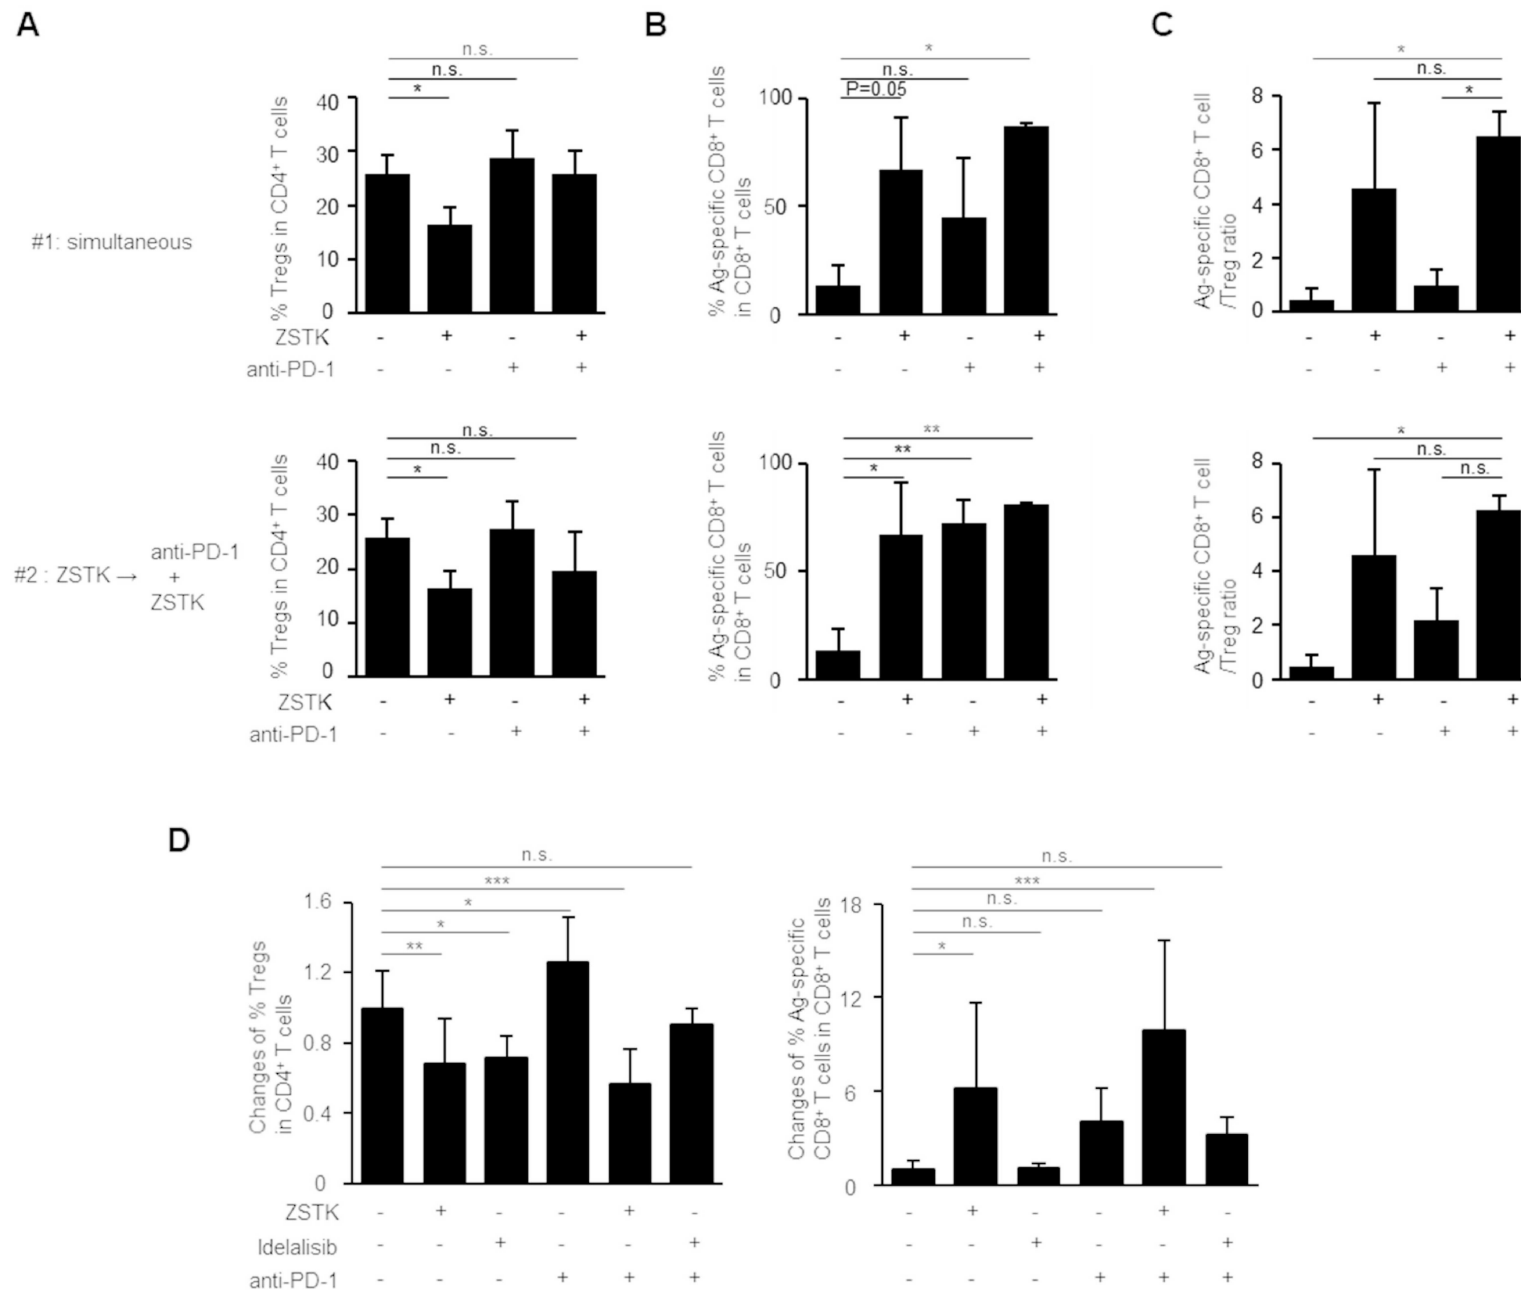

Supplemental figure. S3

Supplement: jitc-2020-002279supp005_data_supplement.pdf [file jitc-2020-002279supp005_data_supplement.pdf]

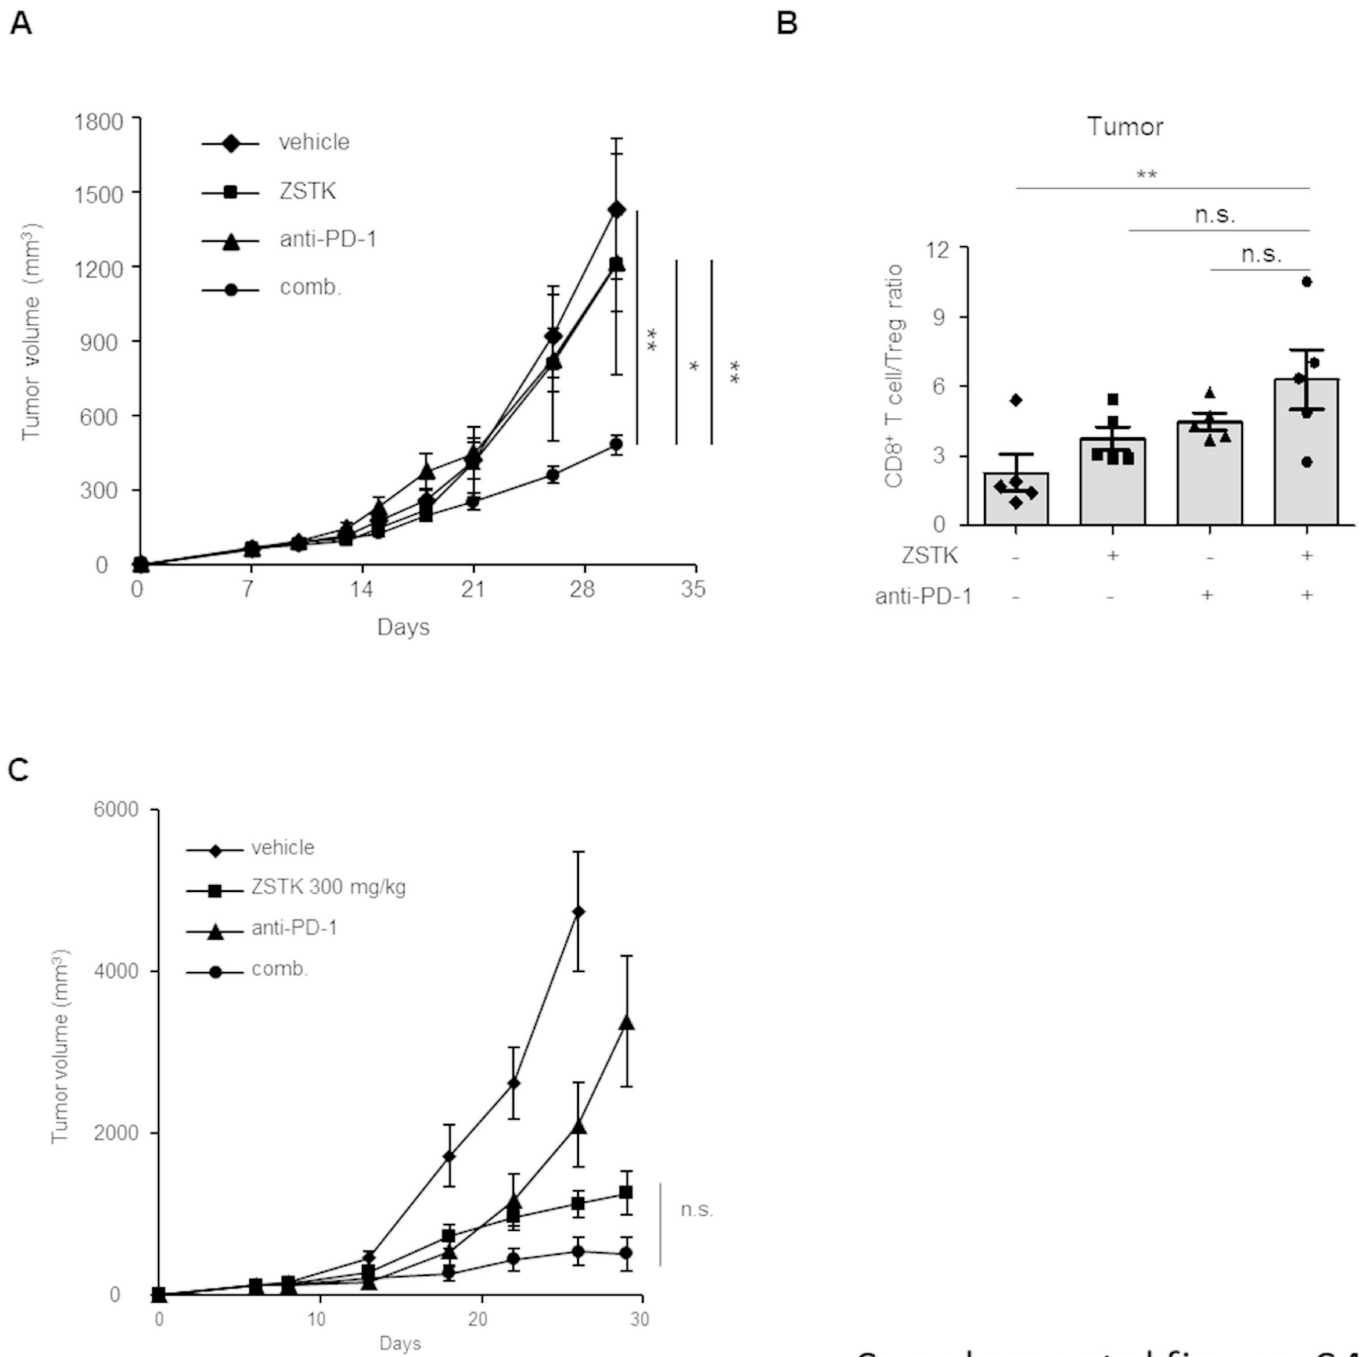

Supplemental figure. S4

Supplement: jitc-2020-002279supp006_data_supplement.pdf [file jitc-2020-002279supp006_data_supplement.pdf]

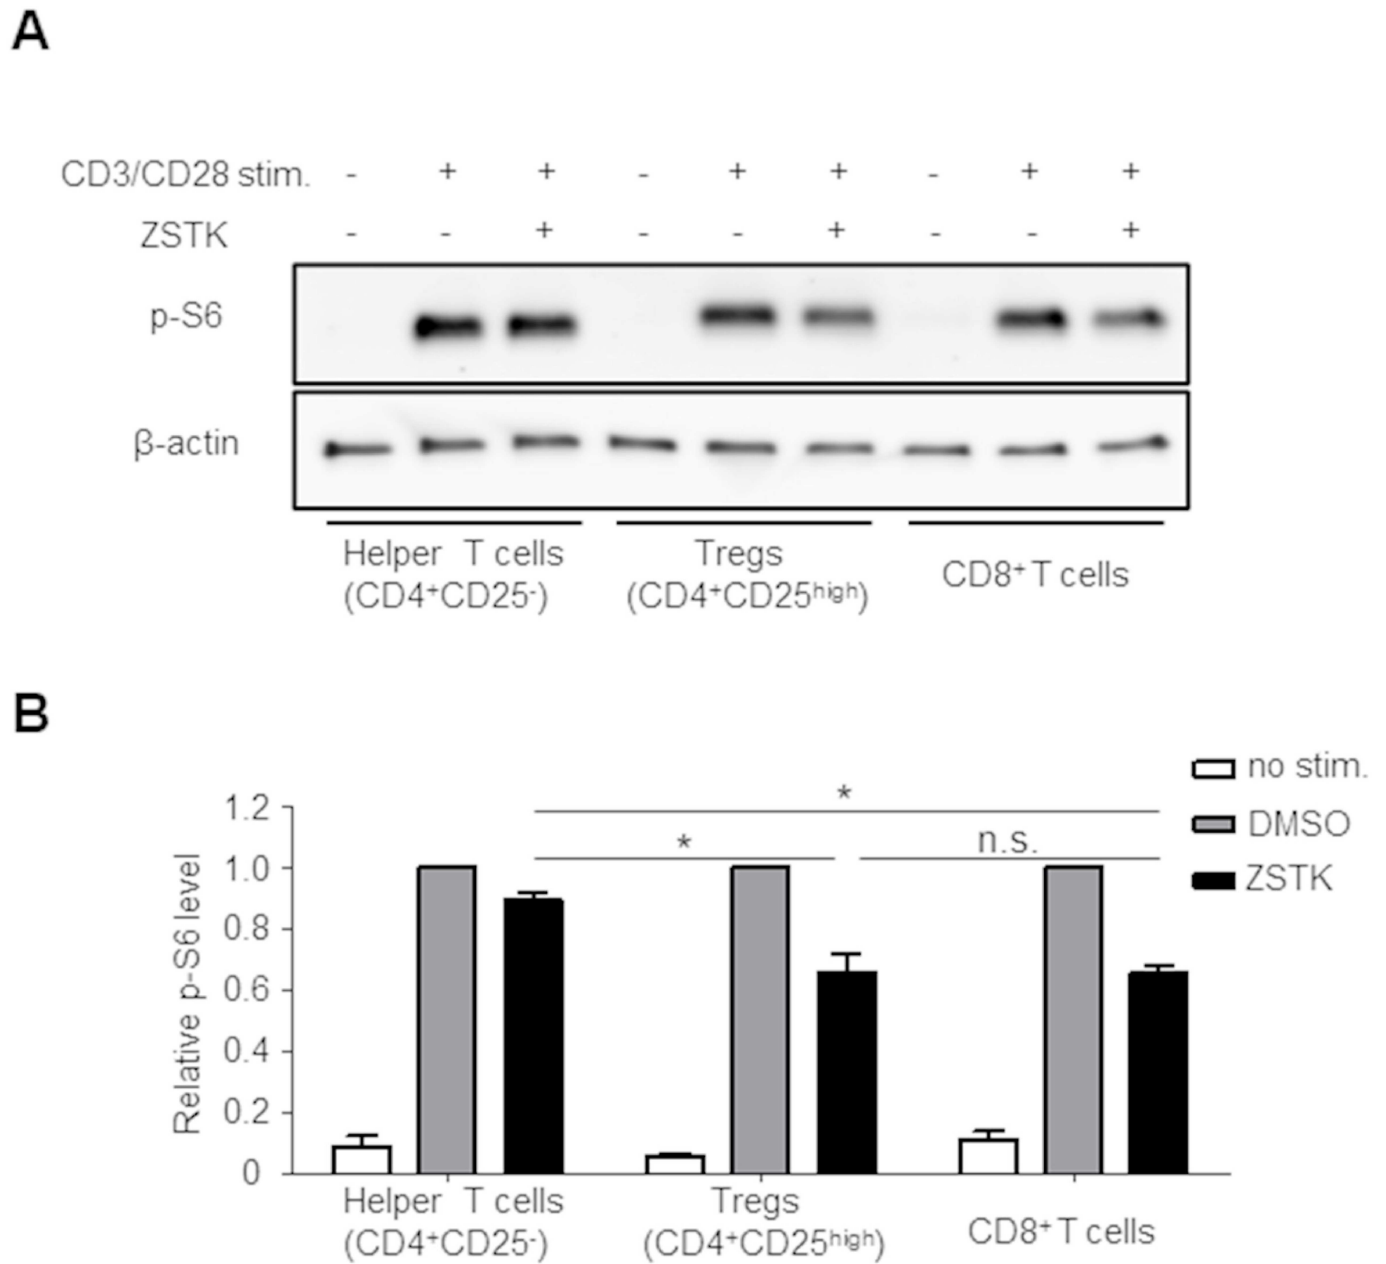

## Supplementary figure. S5

Supplement: jitc-2020-002279supp007_data_supplement.pdf [file jitc-2020-002279supp007_data_supplement.pdf]

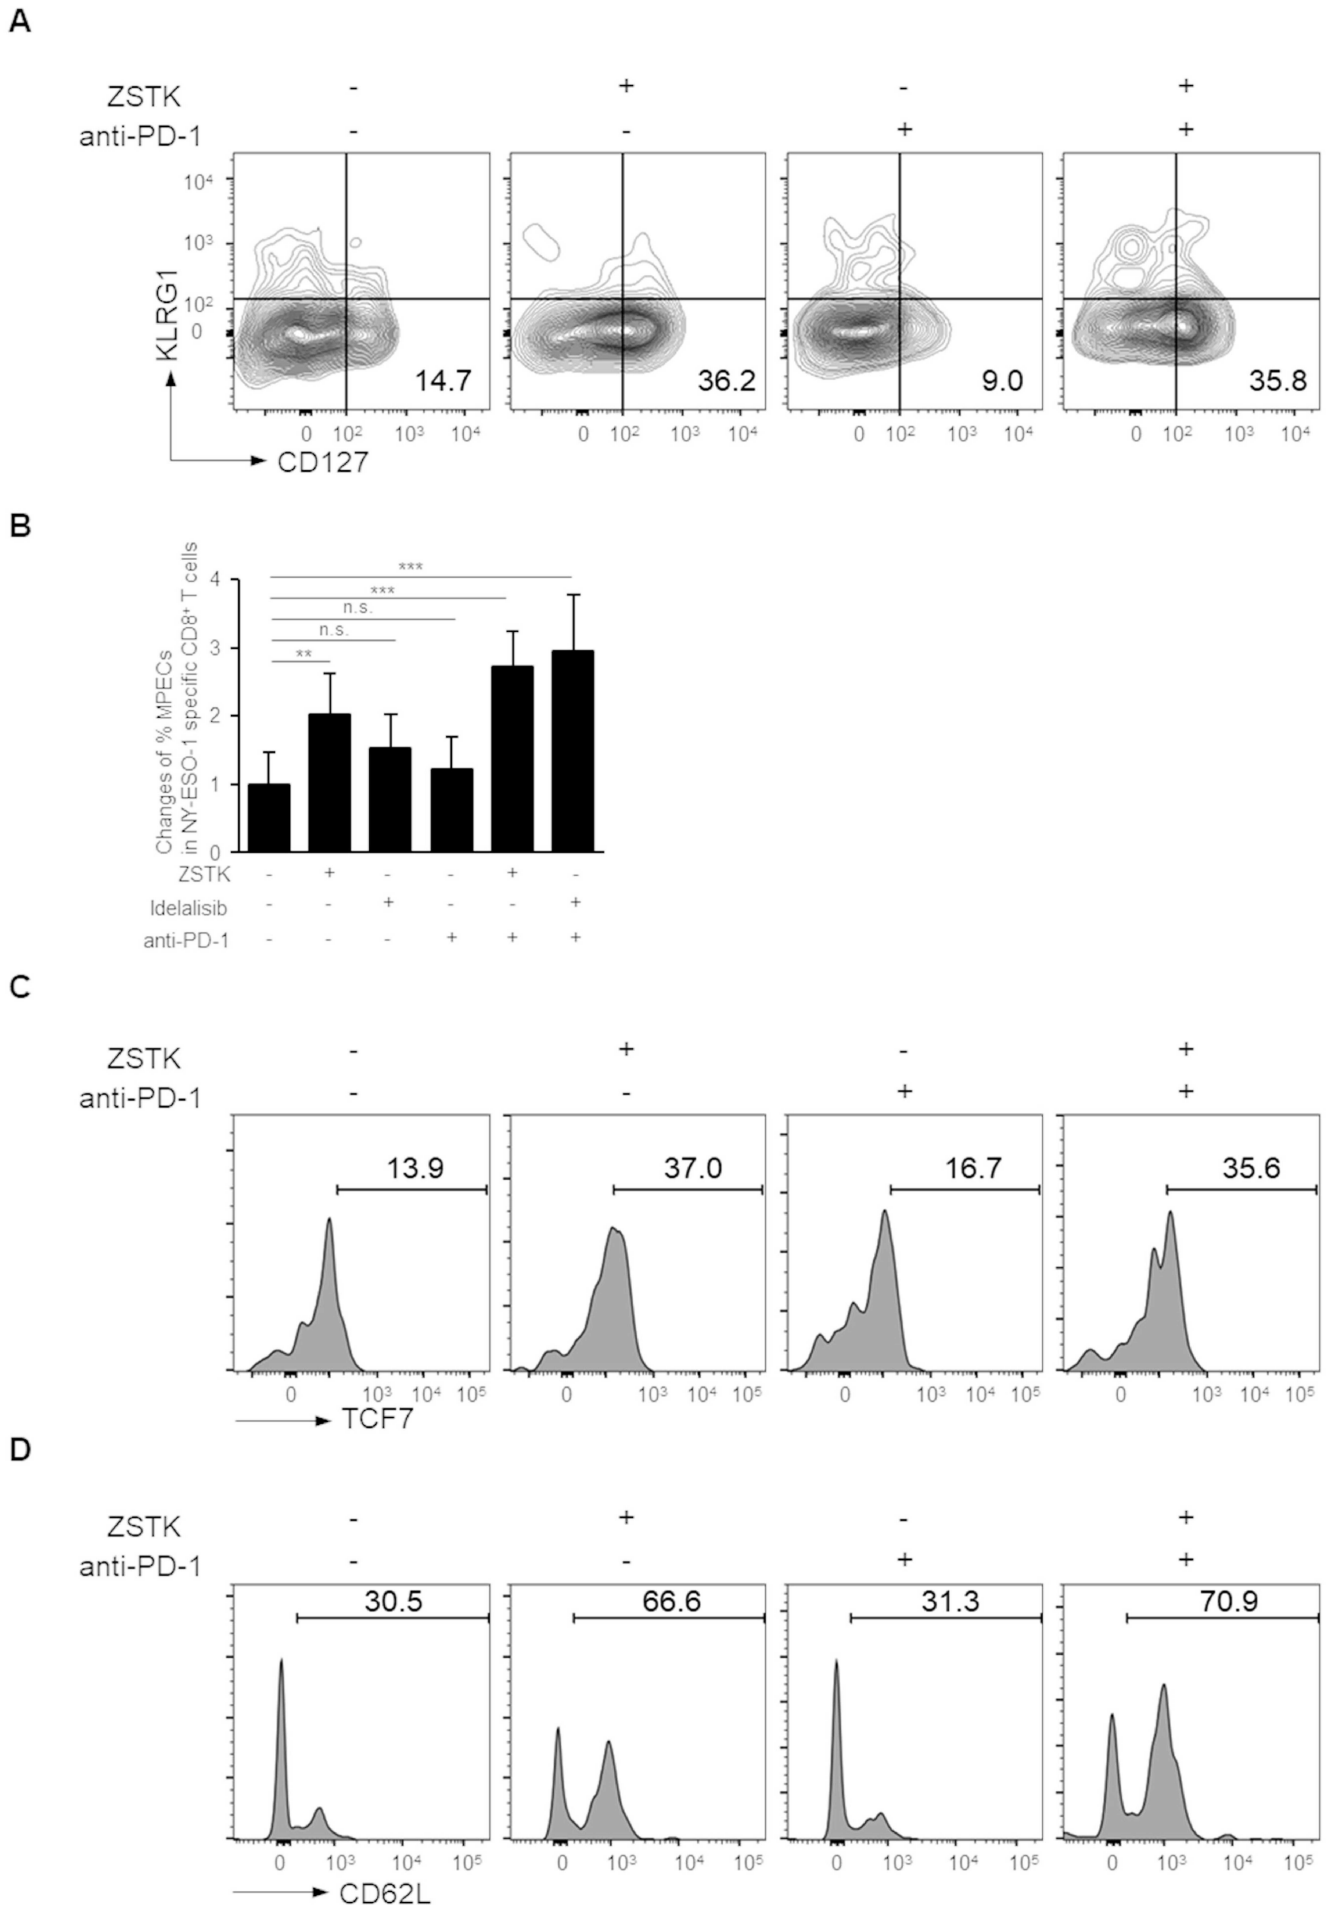

Supplementary figure. S6

Supplement: jitc-2020-002279supp008_data_supplement.pdf [file jitc-2020-002279supp008_data_supplement.pdf]

A

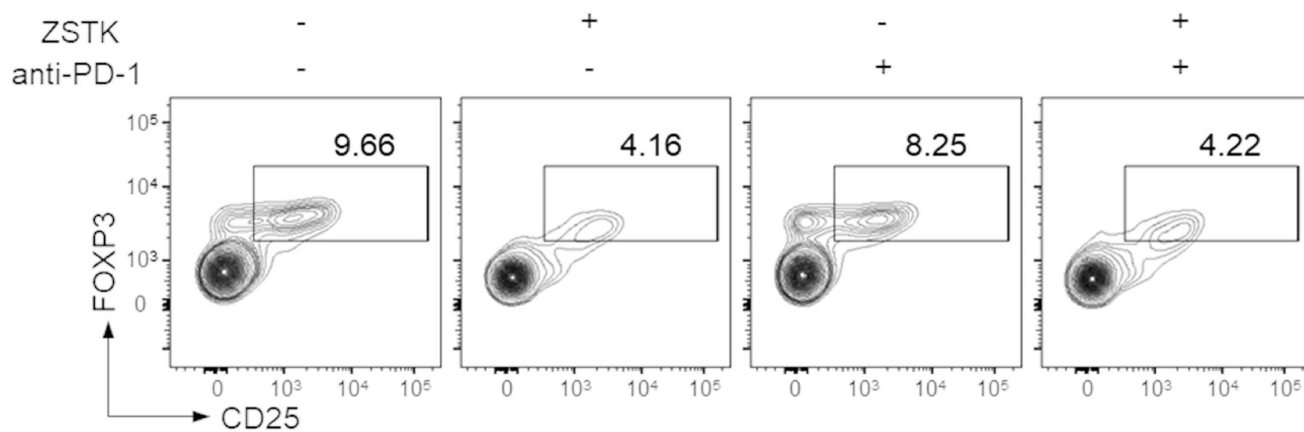

B

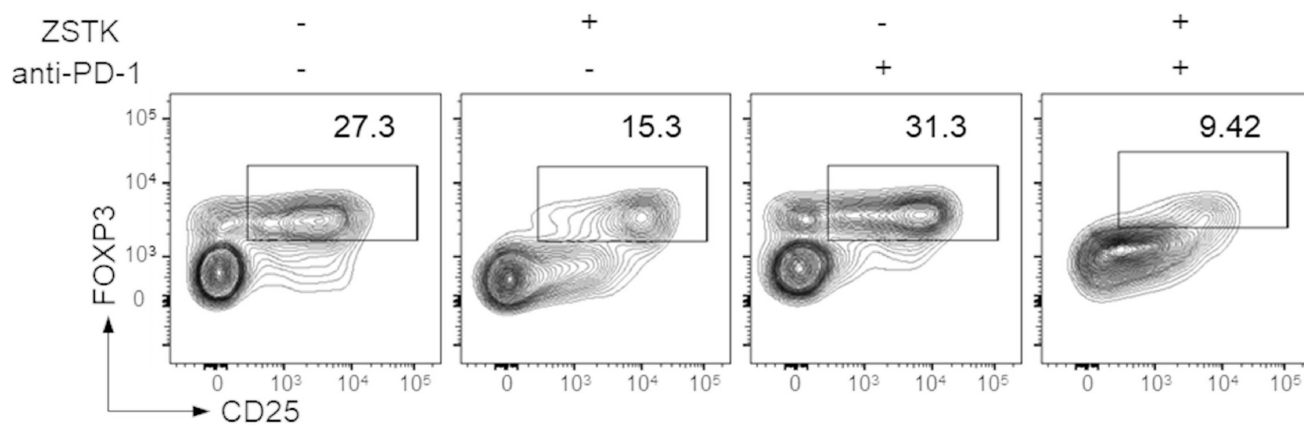

C

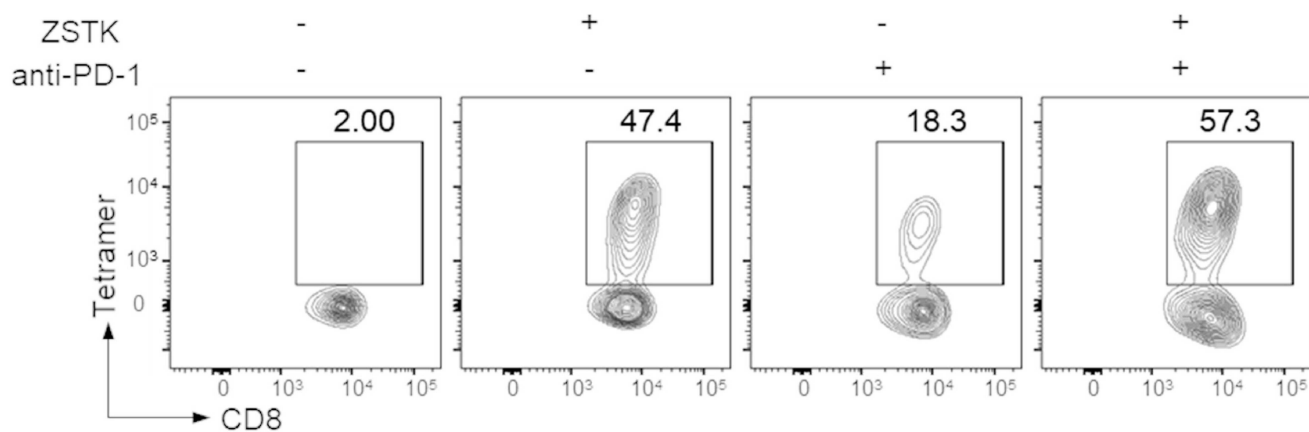

Supplemental figure. S2

Supplement: jitc-2020-002279supp009_data_supplement.pdf [file jitc-2020-002279supp009_data_supplement.pdf]
